# Supplementary material for: APPL1 Is a Prognostic Biomarker and Correlated with Treg Cell Infiltration via Oxygen-Consuming Metabolism in Renal Clear Cell Carcinoma
Source: Hindawi journal article supplement (doi:10.1155/2023/5885203), 2023-02-17

**Supplementary Table 1.** Characteristics of patients with KIRC

| <b>Characteristics</b>    | <b>Variable</b>  | <b>Patients (530)</b> | <b>Percentages (%)</b> |
|---------------------------|------------------|-----------------------|------------------------|
| <b>Vital status</b>       | Alive            | 366                   | 67.90                  |
|                           | Dead             | 173                   | 32.10                  |
| <b>Age</b>                | Mean (SD)        | 60.6 (12.1)           | 49.53                  |
|                           | Median [Min Max] | 61 [26 09]            | 50.47                  |
| <b>Gender</b>             | Female           | 186                   | 34.51                  |
|                           | Male             | 353                   | 65.49                  |
| <b>Pathological stage</b> | I                | 267                   | 50.28                  |
|                           | II               | 57                    | 10.73                  |
|                           | III              | 123                   | 23.16                  |
|                           | IV               | 84                    | 15.82                  |
| <b>T classification</b>   | T1               | 271                   | 51.13                  |
|                           | T2               | 69                    | 13.02                  |
|                           | T3               | 179                   | 33.77                  |
|                           | T4               | 11                    | 2.08                   |
| <b>N classification</b>   | N0               | 240                   | 45.20                  |
|                           | N1               | 16                    | 3.01                   |
|                           | NX               | 275                   | 51.79                  |
| <b>M classification</b>   | M0               | 440                   | 83.02                  |
|                           | M1               | 80                    | 15.09                  |
|                           | MX               | 10                    | 1.89                   |
| <b>Tumor grade</b>        | G1               | 14                    | 2.64                   |
|                           | G2               | 229                   | 43.21                  |
|                           | G3               | 206                   | 38.87                  |
|                           | G4               | 76                    | 14.34                  |
|                           | GX               | 5                     | 0.94                   |

# Supplementary Figure 1

**A**

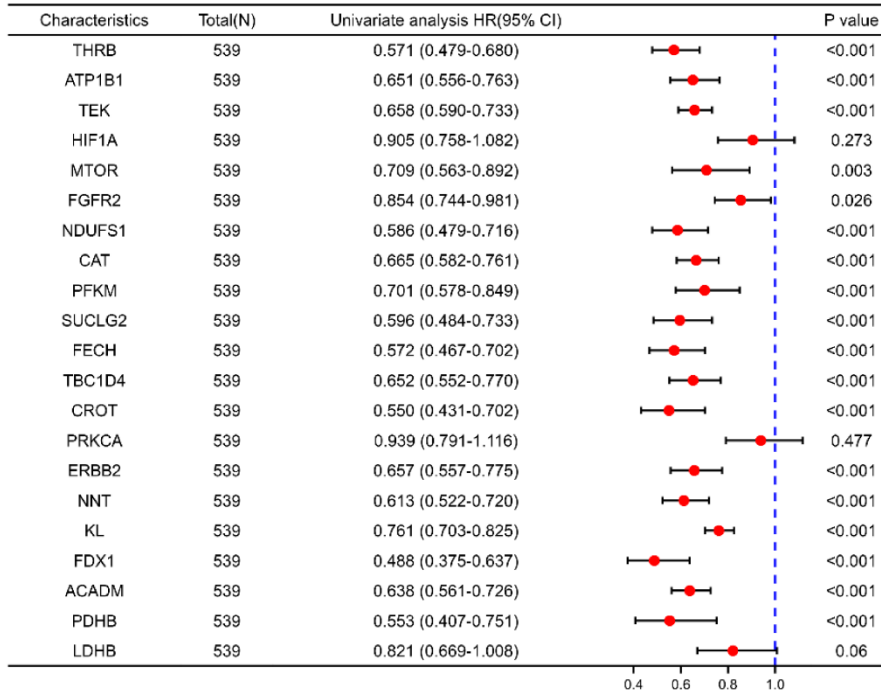

**B**

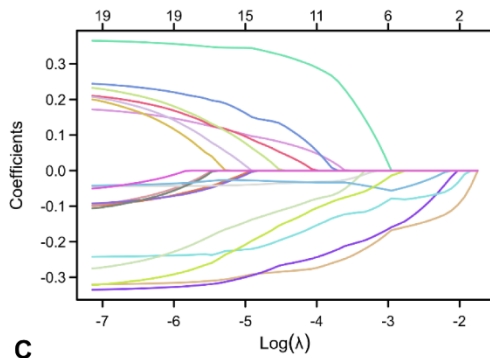

**C**

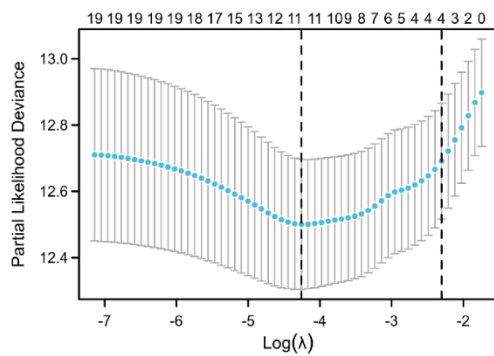

**D**

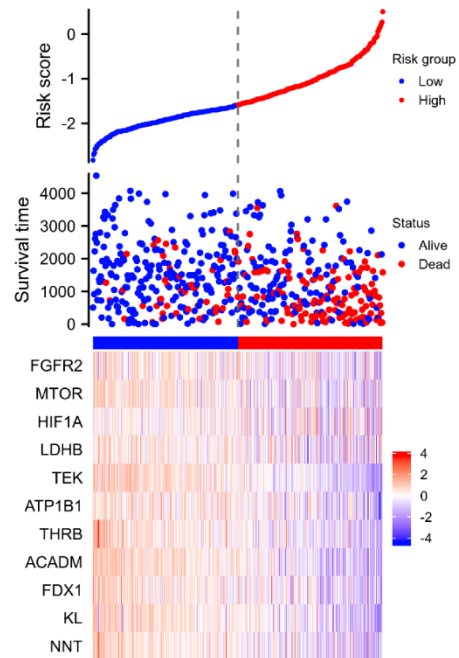

Supplementary Figure 2

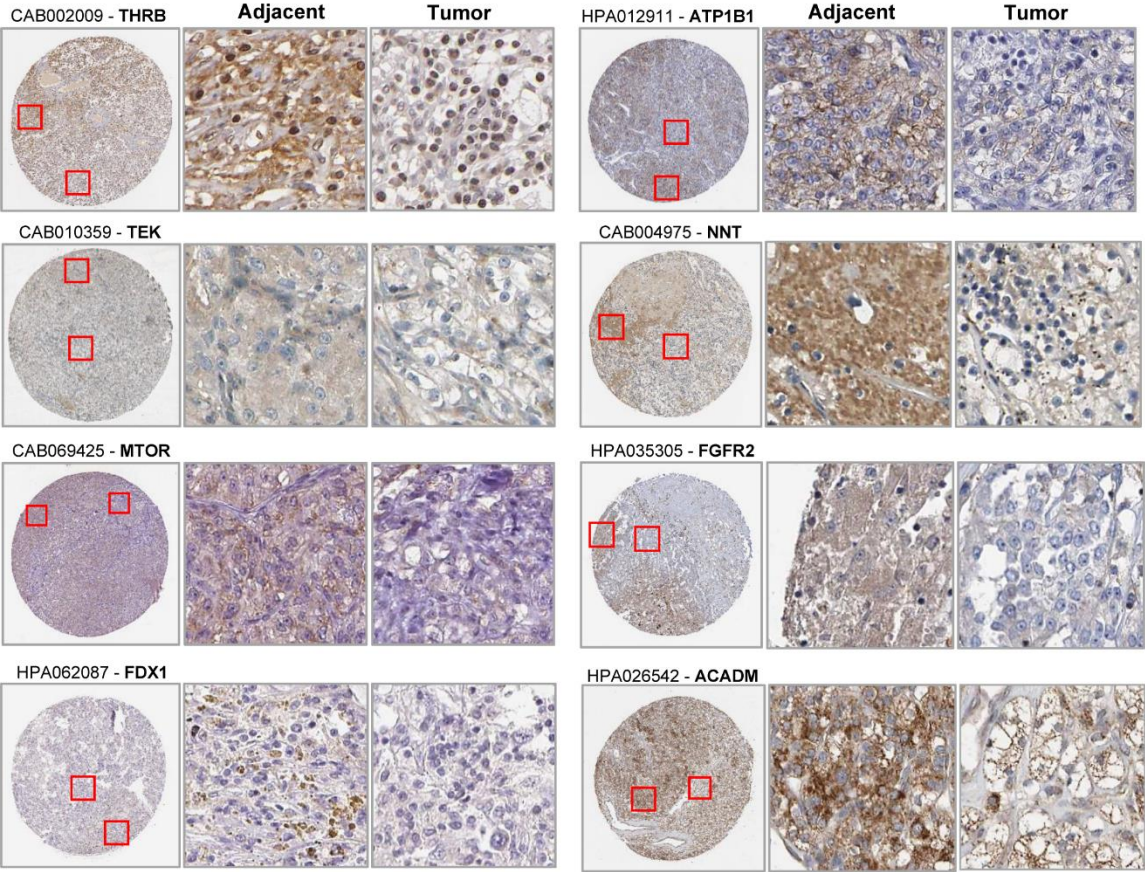

Supplement: f1 [file 5885203.f1.pdf]
